# Supplementary material
Source: Springer Nature journal article supplement (https://www.springermedizin.de/resource/supplementary/12943_2009_574_MOESM15_ESM.pdf/9555012)

**A** Bladder, Tumor  
Histology: squamous cell carcinoma  
Age: 71  
Gender: Male  
Grade: G1  
TNM: T1N0M0

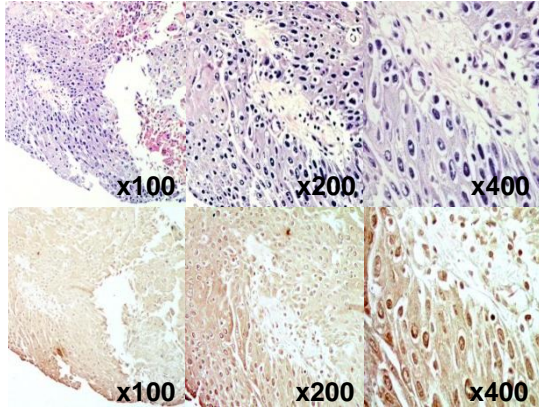

**B** Bladder, Tumor  
Histology: adenocarcinoma  
Age: 76  
Gender: Male  
Grade: G2  
TNM: T2N0M0

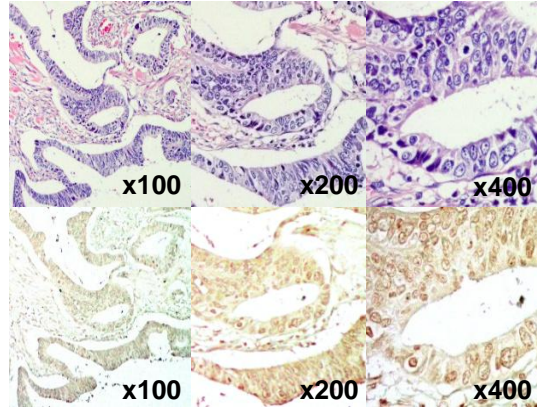

**C** Bladder, Tumor  
Histology: adenocarcinoma  
Age: 50  
Gender: Male  
Grade: G2  
TNM: T2N0M0

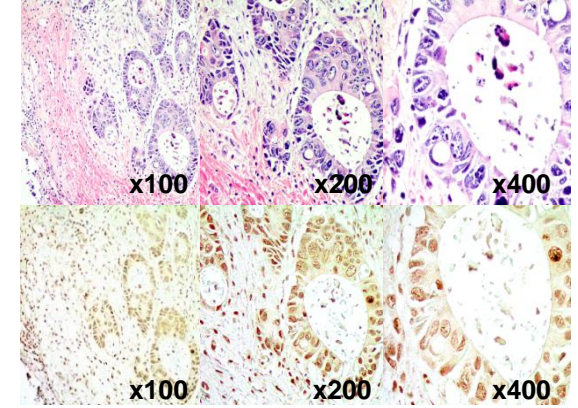

**D** Bladder, Tumor  
Histology: adenocarcinoma  
Age: 68  
Gender: Male  
Grade: G3  
TNM: T2N0M0

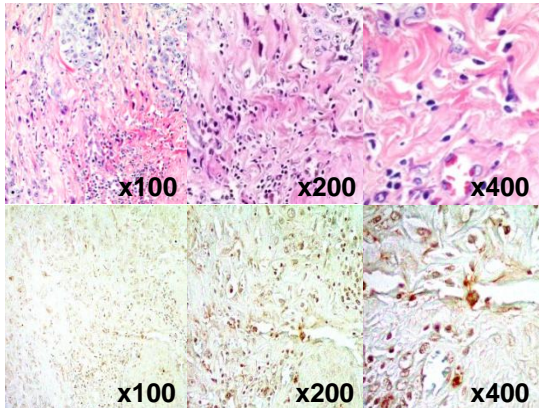

**E** Bladder, Tumor  
Histology: transitional cell carcinoma  
Age: 49  
Gender: Female  
Grade: G1  
TNM: T1N0M0

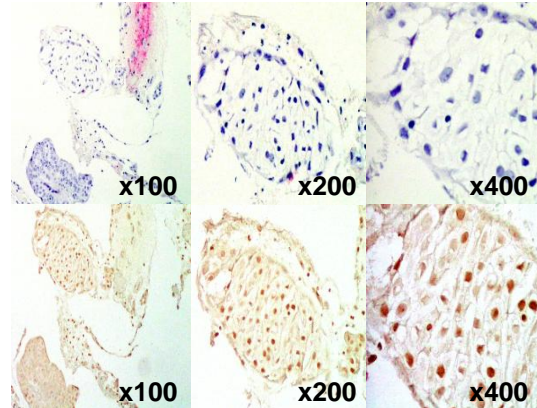

**F** Bladder, Tumor  
Histology: transitional cell carcinoma  
Age: 64  
Gender: Male  
Grade: G3  
TNM: T3N2M1

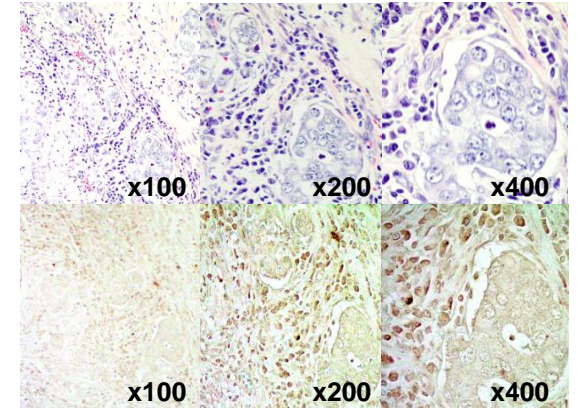

Supplement: MOESM15 [file 9555012]
